# Supplementary material for: High-throughput screening and an interpretable machine learning model of single-atom hydrogen evolution catalysts with an asymmetric coordination environment constructed from heteroatom-doped graphdiyne
Source: Royal Society of Chemistry journal article supplement (doi:10.1039/d4ta08095e), 2025-01-01
Supplement: d4ta08095e1.pdf [file d4ta08095e1.pdf]

High-throughput screening and interpretable machine learning model of  
single-atom hydrogen evolution catalysts with asymmetric coordination  
environment constructed by heteroatom-doped graphdiyne

Ying Zhao<sup>a\*†</sup>; Shuai-Shuai Gao<sup>a†</sup>; Hui-Peng Ren <sup>a</sup>; Li-Shuang Ma <sup>b</sup>; Xue-Bo Chen <sup>a,c\*</sup>

<sup>a</sup> Shandong Laboratory of Advanced Materials and green Manufacturing at Yantai, Yantai  
264000, P. R. China.

<sup>b</sup> College of Chemistry and Chemical Engineering, State Key Laboratory of Heavy Oil

<sup>c</sup> College of Chemistry, Beijing Normal University, Beijing, 100091, P. R. China

---

\* Corresponding author email: [yingz@amgm.ac.cn](mailto:yingz@amgm.ac.cn); [xuebochen@bnu.edu.cn](mailto:xuebochen@bnu.edu.cn)

† These authors contributed equally to this work and should be considered co-first authors

Table. S1 The formation energies ( $E_f$ ) of HM@NM–GDY in units of eV

| HM-GDY | $E_f$    |
|--------|----------|
| N1     | -7.3880  |
| N2     | -8.2008  |
| B1     | -4.3552  |
| B2     | -5.3473  |
| S1     | -4.1468  |
| S2     | -4.3388  |
| B1S2   | -3.4610  |
| B1S3   | -7.3080  |
| B1S4   | -9.6610  |
| B2S1   | -3.7872  |
| B2S3   | -9.9717  |
| B2S4   | -10.7098 |
| N1B2   | -8.0363  |
| N1B3   | -10.5460 |
| N1B4   | -13.4920 |
| N2B1   | -7.7678  |
| N2B3   | -12.9711 |
| N2B4   | -14.1752 |
| N1S2   | -6.2693  |
| N1S3   | -9.9797  |
| N1S4   | -12.5373 |
| N2S1   | -6.1456  |
| N2S3   | -12.5050 |
| N2S4   | -13.1408 |

Table. S2 The formation energies ( $E_f$ ) of the 120 kinds of TM@NM–GDY in units of eV. The number of coordination between the metal atom and the environment atoms.

| $E_f$ | Cr       |   | Mn       |   | Fe       |   | Co       |   | Ni       |   |
|-------|----------|---|----------|---|----------|---|----------|---|----------|---|
| N1    | -6.1275  | 4 | -5.7635  | 4 | -5.9639  | 4 | -5.9644  | 4 | -6.0676  | 4 |
| N2    | -6.7572  | 4 | -6.8480  | 4 | -7.0861  | 4 | -7.0009  | 4 | -7.1457  | 4 |
| B1    | -3.5791  | 4 | -4.2918  | 4 | -4.2345  | 4 | -3.8934  | 4 | -4.3814  | 4 |
| B2    | 2.0810   | 4 | -5.4276  | 4 | -5.3001  | 4 | -4.9144  | 4 | -5.2794  | 4 |
| S1    | -3.7744  | 4 | -3.8208  | 4 | -4.0237  | 4 | -3.8211  | 4 | -3.7770  | 4 |
| S2    | -3.3384  | 4 | -4.7402  | 4 | -4.8800  | 4 | -4.6050  | 4 | -4.7376  | 4 |
| B1S2  | -2.1643  | 5 | -1.6973  | 6 | -2.0514  | 6 | -3.3618  | 4 | -3.3894  | 4 |
| B1S3  | -6.6830  | 5 | -6.9492  | 5 | -6.9490  | 4 | -6.6332  | 4 | -6.8236  | 4 |
| B1S4  | -        | - | -        | - | -        | - | -10.6203 | 5 | -        | - |
| B2S1  | -2.8308  | 5 | -        | - | -3.8229  | 4 | -3.7175  | 4 | -3.6128  | 4 |
| B2S3  | -9.1953  | 4 | -9.7236  | 5 | -9.6978  | 4 | -9.3476  | 4 | -9.5812  | 4 |
| B2S4  | -10.7773 | 4 | -11.3748 | 5 | -11.4245 | 4 | -11.1294 | 4 | -11.2373 | 4 |
| N1B2  | -6.0188  | 4 | -6.1945  | 4 | -5.5637  | 4 | -6.0787  | 4 | -6.7106  | 4 |

|      |          |   |          |   |          |   |          |   |          |   |
|------|----------|---|----------|---|----------|---|----------|---|----------|---|
| N1B3 | -9.8209  | 4 | -9.8381  | 4 | -9.3262  | 4 | -9.6993  | 4 | -10.1160 | 4 |
| N1B4 | -        | - | -12.8893 | 4 | -12.7883 | 4 | -12.5181 | 4 | -12.9821 | 4 |
| N2B1 | -5.6646  | 5 | -6.2123  | 4 | -6.2632  | 4 | -6.2583  | 4 | -6.6833  | 4 |
| N2B3 | -12.7578 | 4 | -11.3435 | 5 | -12.4909 | 4 | -12.7426 | 4 | -12.9182 | 4 |
| N2B4 | -        | - | -13.7497 | 4 | -13.7896 | 4 | -13.6124 | 4 | -13.9246 | 4 |
| N1S2 | -5.0721  | 4 | -4.9817  | 4 | -4.7393  | 4 | -        | - | -        | - |
| N1S3 | -6.5657  | 4 | -6.8314  | 4 | -7.5857  | 4 | -7.8219  | 4 | -8.1475  | 4 |
| N1S4 | -11.1308 | 5 | -        | - | -10.1793 | 4 | -10.6378 | 4 | -10.9456 | 4 |
| N2S1 | -        | - | -        | - | -        | - | -        | - | -        | - |
| N2S3 | -11.1998 | 4 | -11.0008 | 4 | -11.0652 | 4 | -11.1719 | 4 | -11.3498 | 4 |
| N2S4 | -12.0154 | 4 | -        | - | -11.7387 | 4 | -11.8070 | 4 | -12.0309 | 4 |

---

**Table. S3** The adsorption energies ( $E_{\text{ads}}$ ) of the 103 kinds of TM@NM–GDY in units of eV and the bond lengths in units of Å.

| $E_f$ | Cr               |                   | Mn               |                   | Fe               |                   | Co               |                   | Ni               |                   |
|-------|------------------|-------------------|------------------|-------------------|------------------|-------------------|------------------|-------------------|------------------|-------------------|
|       | $E_{\text{ads}}$ | $d_{\text{TM-H}}$ |
| N1    | 0.5685           | 1.591             | 0.1575           | 1.538             | -0.1415          | 1.475             | 0.2254           | 1.476             | -0.3918          | 1.48              |
| N2    | 0.1978           | 1.59              | 0.1499           | 1.535             | -0.0036          | 1.479             | -0.8072          | 1.447             | -0.2860          | 1.484             |
| B1    | 0.1942           | 1.603             | 0.2785           | 1.563             | 0.1576           | 1.498             | -0.2054          | 1.465             | 0.2382           | 1.445             |
| B2    | -                | -                 | 0.2404           | 1.581             | 0.1253           | 1.496             | -0.6166          | 1.588             | -0.5054          | 1.561             |
| S1    | -0.1285          | 1.612             | -0.0499          | 1.556             | -0.0630          | 1.533             | 0.2795           | 1.494             | -0.1345          | 1.482             |
| S2    | -0.9787          | 1.6               | 0.0825           | 1.555             | 0.1335           | 1.518             | 0.0216           | 1.475             | 0.3051           | 1.523             |
| B1S2  | -0.4035          | 1.58              | -0.0245          | 1.576             | -                | -                 | 0.1867           | 1.464             | 0.2433           | 1.523             |
| B1S3  | -0.0044          | 1.584             | -0.1107          | 1.589             | -0.1215          | 1.561             | -0.0576          | 1.525             | -0.0248          | 1.500             |
| B1S4  | -                | -                 | -                | -                 | -                | -                 | 0.0313           | 1.459             | -                | -                 |
| B2S1  | -1.1400          | 1.752             | -                | -                 | -0.1063          | 1.524             | -0.5470          | 1.694             | -0.9780          | 1.656             |
| B2S3  | -0.2294          | 1.59              | 0.3391           | 1.545             | 0.0981           | 1.509             | 0.0596           | 1.464             | -0.0453          | 1.502             |
| B2S4  | -0.2049          | 1.584             | 0.1923           | 1.567             | -0.0140          | 1.513             | 0.0584           | 1.462             | -1.0092          | 1.622             |
| N1B2  | 0.1261           | 1.593             | -0.1305          | 1.600             | -0.5536          | 1.482             | -0.1642          | 1.445             | 0.0432           | 1.598             |
| N1B3  | 0.1353           | 1.604             | -0.0043          | 1.61              | -0.5758          | 1.493             | -0.1844          | 1.449             | 0.5892           | 1.486             |
| N1B4  | -                | -                 | 0.2716           | 1.547             | 0.0115           | 1.488             | -0.2451          | 1.452             | 0.1069           | 1.542             |
| N2B1  | -0.2423          | 1.591             | 0.5820           | 1.535             | 0.0028           | 1.490             | 0.0529           | 1.443             | 0.8029           | 1.518             |
| N2B3  | 0.2199           | 1.595             | -                | -                 | -0.5457          | 1.490             | -0.0592          | 1.452             | 0.1940           | 1.499             |
| N2B4  | -                | -                 | 0.2806           | 1.535             | 0.0237           | 1.491             | -0.0304          | 1.444             | 0.1705           | 1.497             |
| N1S2  | -0.0740          | 1.6               | 0.1472           | 1.540             | -0.3066          | 1.488             | -                | -                 | -                | -                 |
| N1S3  | -1.7939          | 1.633             | -1.3506          | 1.599             | -0.2774          | 1.485             | -0.1492          | 1.506             | -                | -                 |
| N1S4  | 0.0393           | 1.614             | -                | -                 | -0.3396          | 1.511             | 0.0460           | 1.487             | 0.4258           | 1.48              |
| N2S1  | -                | -                 | -                | -                 | -                | -                 | -                | -                 | -                | -                 |
| N2S3  | 0.2347           | 1.594             | 0.0477           | 1.605             | -0.1229          | 1.48              | 0.0261           | 1.463             | -0.0114          | 1.491             |
| N2S4  | 0.2416           | 1.595             | -                | -                 | -0.1038          | 1.481             | -0.0010          | 1.458             | 0.2892           | 1.474             |

**Table S4** The obtained Gibbs free energy of adsorption of hydrogen ( $\Delta G_{*H}$ ) for TM@NM-GDY.

|      | Cr      | Mn      | Fe      | Co      | Ni      |
|------|---------|---------|---------|---------|---------|
| N1   | 0.8121  | 0.4181  | 0.1284  | 0.4627  | -0.1400 |
| N2   | 0.4407  | 0.4192  | 0.2274  | -0.5240 | -0.0209 |
| B1   | 0.3898  | 0.5161  | 0.4148  | 0.0622  | 0.4958  |
| B2   | -       | 0.4548  | 0.3705  | -0.3177 | -0.1984 |
| S1   | 0.1074  | 0.2062  | 0.1752  | 0.5480  | 0.1092  |
| S2   | -0.7555 | 0.2846  | 0.3946  | 0.2989  | 0.5387  |
| B1S2 | -0.1444 | 0.2125  | -       | 0.4557  | 0.4920  |
| B1S3 | 0.2491  | 0.1073  | 0.1152  | 0.1800  | 0.2343  |
| B1S4 | -       | -       | -       | 0.2860  | -       |
| B2S1 | -0.8393 | -       | 0.1533  | -0.2547 | -0.6799 |
| B2S3 | 0.0097  | 0.5924  | 0.3218  | 0.3119  | 0.2114  |
| B2S4 | 0.0437  | 0.4516  | 0.2430  | 0.3261  | -0.6876 |
| N1B2 | 0.3605  | 0.0467  | -0.3044 | 0.1126  | 0.3433  |
| N1B3 | 0.3257  | 0.1782  | -0.3259 | 0.0857  | 0.8260  |
| N1B4 | -       | 0.5233  | 0.2749  | 0.0353  | 0.3946  |
| N2B1 | -0.0046 | 0.8486  | 0.2520  | 0.3401  | 1.0373  |
| N2B3 | 0.4610  | -0.8521 | -0.2694 | 0.2160  | 0.4477  |
| N2B4 | -       | 0.5323  | 0.2909  | 0.2503  | 0.4115  |
| N1S2 | 0.1768  | 0.3544  | -0.0356 | -       | -       |
| N1S3 | -1.5762 | -1.1193 | -0.0189 | 0.1076  | -0.9670 |
| N1S4 | 0.2626  | -       | -0.0847 | 0.3075  | 0.6846  |
| N2S1 | -       | -       | -       | -       | -       |
| N2S3 | 0.4616  | 0.2775  | 0.1358  | 0.3039  | 0.2399  |
| N2S4 | 0.4677  | -       | 0.1778  | 0.2737  | 0.5332  |

**Table S5** The adsorption energies ( $E_{ads}$ ) of the possible TM adsorption sites for five potential HER catalysts in units of eV.

|   | Cr@N2B1-<br>GDY | Mn@N1B2-<br>GDY | Fe@N1S2-<br>GDY | Co@N1B4-<br>GDY | Ni@N2-<br>GDY |
|---|-----------------|-----------------|-----------------|-----------------|---------------|
| 1 | -4.83           | -               | -               | -               | -6.06         |
| 2 | -4.45           | -5.08           | -               | -               | -6.06         |
| 3 | -2.35           | -5.03           | -               | -11.45          | -5.67         |
| 4 | -5.66           | -6.19           | -4.74           | -12.52          | -7.15         |

**Table S6** The adsorption free energies ( $\Delta G_{*H}$ ) of different adsorption sites in the five candidates.

| SACs        | $\Delta G_{*H}(N)$ | $\Delta G_{*H}(B/S)$ | $\Delta G_{*H}(TM)$ |
|-------------|--------------------|----------------------|---------------------|
| Cr@N2B1-GDY | 1.0555             | -0.8521              | -0.0046             |
| Mn@N1B2-GDY | -0.5579            | -0.8440              | 0.0467              |
| Fe@N1S2-GDY | -                  | -                    | -0.0356             |
| Co@N1B4-GDY | -1.2619            | -0.3371              | 0.0353              |
| Ni@N2-GDY   | -0.0111            |                      | -0.0209             |

**Table S7** The calculated adsorption free energies of the 5 promising systems under implicit solvation effects.

| $\Delta G_{*H}$ | Without implicit solvation effect | With implicit solvation effect |
|-----------------|-----------------------------------|--------------------------------|
| Cr@N2B1-GDY     | -0.0046                           | 0.0369                         |
| Mn@N1B2-GDY     | 0.0467                            | 0.9593                         |
| Fe@N1S2-GDY     | -0.0356                           | 0.0329                         |
| Co@N1B4-GDY     | 0.0353                            | -0.0864                        |
| Ni@N2-GDY       | -0.0209                           | 0.1393                         |

**Table. S8** Comparison of the adsorption energies ( $E_{ads}$ ) and Gibbs free energies ( $\Delta G_{*H}$ ) between the 5 TM@HM-GDY candidates and their corresponding SAC-GDY systems.

|             | $E_{ads}$ | $\Delta G_{*H}$ |
|-------------|-----------|-----------------|
| Cr@N2B1-GDY | -0.2423   | -0.0046         |
| Cr-GDY      | -4.0618   | -3.8261         |
| Mn@N1B2-GDY | -0.1305   | 0.0467          |
| Mn-GDY      | -14.1327  | -13.9732        |
| Fe@N1S2-GDY | -0.3066   | -0.0356         |
| Fe-GDY      | -15.4884  | -15.2480        |
| Co@N1B4-GDY | -0.2451   | 0.0353          |
| Co-GDY      | -24.1867  | -23.9120        |
| Ni@N2-GDY   | -0.2860   | -0.0209         |
| Ni-GDY      | -16.3838  | -16.1629        |

**Table S9** The Bader charge of TM atom in 5 TM@NM-GDY catalysts.

|             | TM    | *H   |
|-------------|-------|------|
| Cr@N2B1-GDY | -1.06 | 1.28 |
| Mn@N1B2-GDY | -0.99 | 1.31 |
| Fe@N1S2-GDY | -0.75 | 1.14 |
| Co@N1B4-GDY | -0.63 | 1.05 |
| Ni@N2-GDY   | -0.52 | 1.17 |

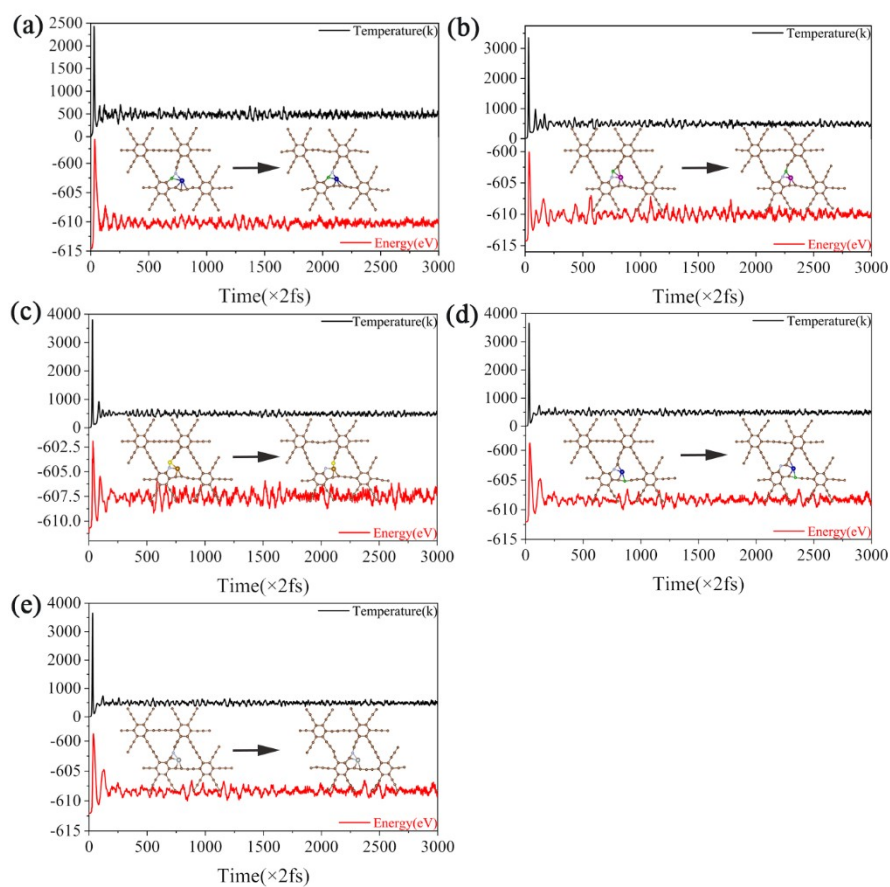

**Fig. S1** The AIMD simulations of (a) Cr@N2B1-GDY, (b) Mn@N1B-GDY, (c) Fe@N1S2-GDY, (d) Co@N1B4-GDY and (e) Ni@N2-GDY.

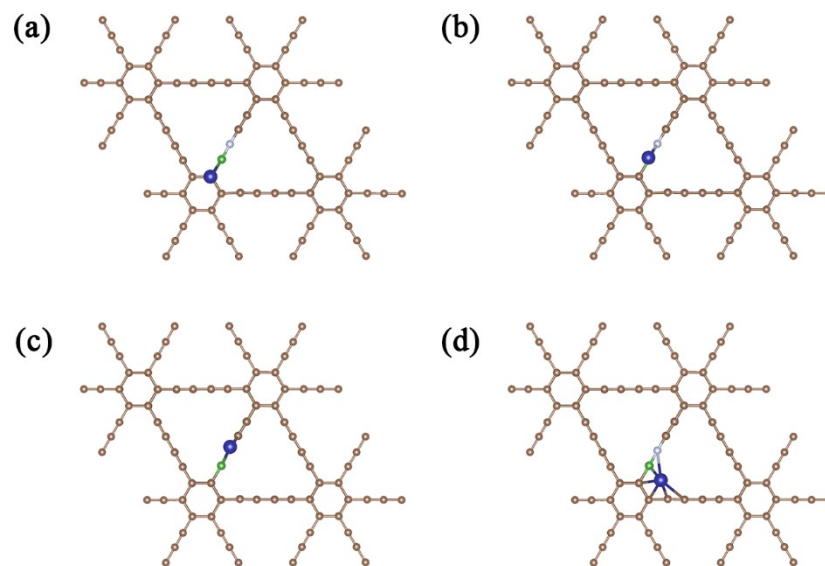

**Fig. S2** Top view of the TM atom adsorption sites, taking the Cr@N2B1-GDY configuration as an example.



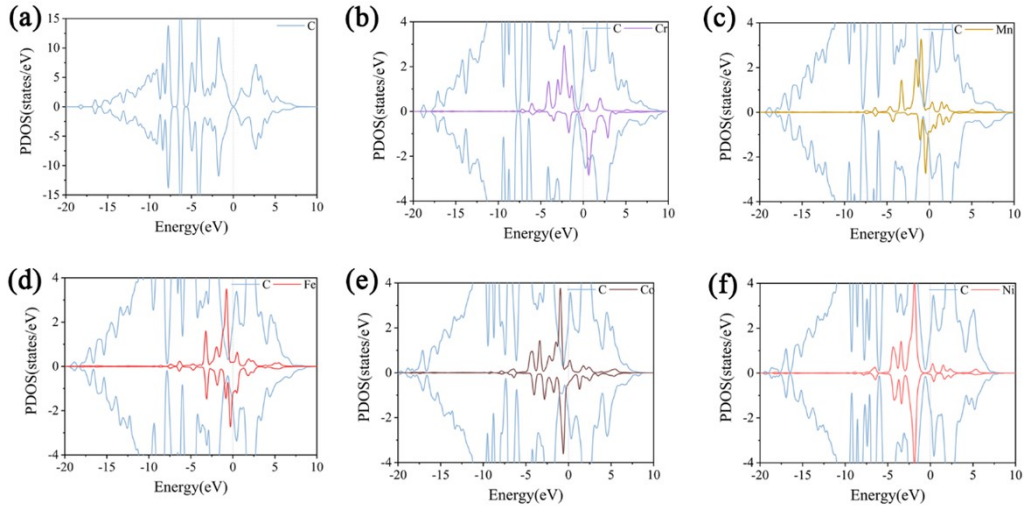

**Fig. S3** The partial density of states (PDOS) of (a) pristine GDY, (b) Cr-GDY, (c) Mn-GDY, (d) Fe-GDY, (e) Co-GDY and (f) Ni-GDY.

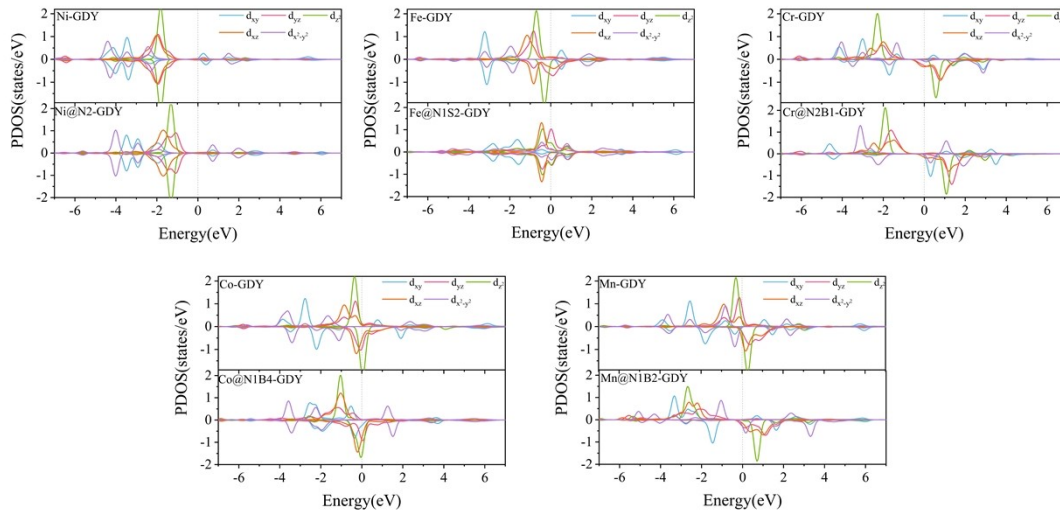

**Fig. S4** The partial density of states (PDOS) of the TM center in SAC-GDY and TM@HM-GDY.

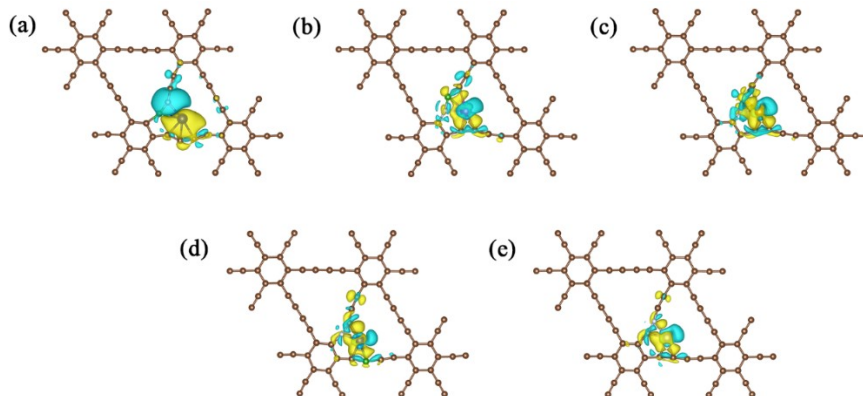

**Fig. S5** Top views of the three-dimensional charge density difference plots for (a) Cr@N2B1-GDY, (b) Mn@N1B2-GDY, (c) Fe@N1S2-GDY, (d) Co@N1B4-GDY and (e) Ni@N2-GDY with an isovalue of  $0.003 \text{ e } \text{\AA}^3$ .

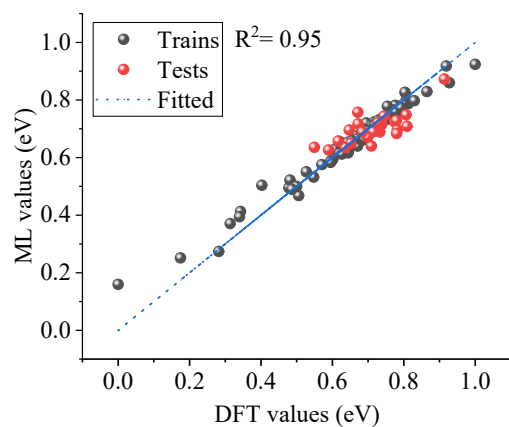

Fig. S6. Distribution of true and predicted values of RF machine learning model without principal component analysis

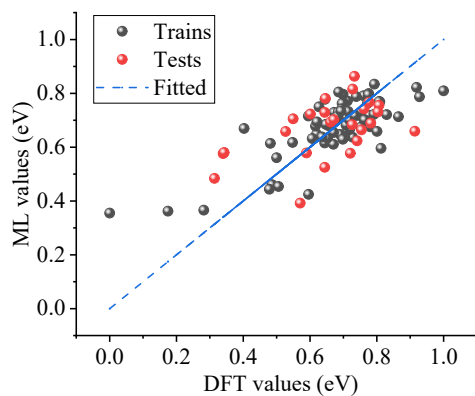

Fig. S7. Distribution of true and predicted values of ElasticNet machine learning model

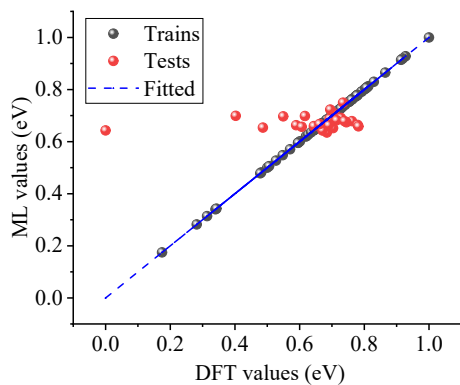

Fig. S8. Distribution of true and predicted values of KNN machine learning model

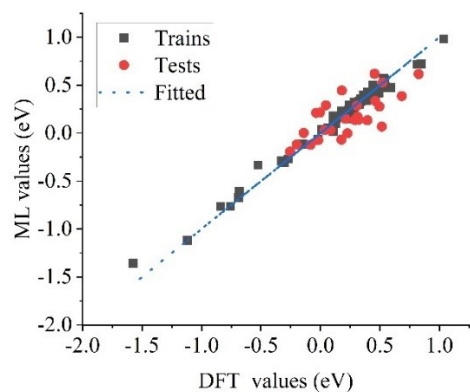

**Fig. S9** True value and predicted value in MGBost machine learning model

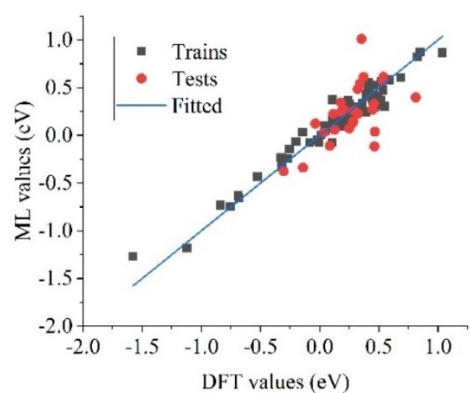

**Fig. S10** True value and predicted value in LGB machine learning model

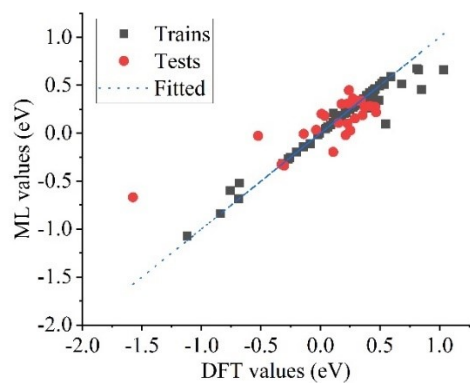

**Fig. S11** True value and predicted value in SVR machine learning model
